# Supplementary material for: Impact and Implementation of an Early Years Fundamental Motor Skills Intervention for Children 4–5 Years
Source: MDPI journal article supplement (doi:10.3390/children11040416), 2024-04-01
Supplement: s1 [file s1]

Class: EYFS

Date:

Topic: Lesson 2 Method of travel

What we are learning today (WALT):

- Developing movements using different methods of travel
- Exploring ways of travelling using different parts of the body

Student Numbers: Male: \_\_\_\_\_ Female: \_\_\_\_\_ SEN: \_\_\_\_\_ G&T: \_\_\_\_\_

|              |                                                                                                                                                                                                                                                                                                                                                                                                                                                                                                                                                                                                                                                                                                                                                                                                                                                                                                                                                                       |                         |
|--------------|-----------------------------------------------------------------------------------------------------------------------------------------------------------------------------------------------------------------------------------------------------------------------------------------------------------------------------------------------------------------------------------------------------------------------------------------------------------------------------------------------------------------------------------------------------------------------------------------------------------------------------------------------------------------------------------------------------------------------------------------------------------------------------------------------------------------------------------------------------------------------------------------------------------------------------------------------------------------------|-------------------------|
| <b>Times</b> | <p><b>Starter activities:</b></p> <p><b>“Here, There, Everywhere”</b> - (Running “Here” = To me)<br/>(Running “There” = Wherever I point)<br/>(Running “everywhere” = I chase &amp; tag you)</p> <p><b>“Musical statues”</b> - (Walk, run, jog, dance, skip - freeze when music stops)</p> <p><b>Learning activities:</b></p> <p><b>“Sausage sizzle”</b> - (Log rolls along the mats)</p> <p><b>“Sammy snail”</b> - (Lie on Tummy, bean bag on back, commando crawl, don't lose your house)</p> <p><b>“Crab Grab”</b> - (Bean bags all around the room, pick up bean bags using feet, put in to the basket.)</p> <p><b>“Jumping jelly”</b> - (Jump feet together, count jumps least jumps to win)</p> <p><b>“2 Forward, 1 back”</b> - (Jump feet together, 2 forwards and 1 back, from 1 side of the room to the other)</p> <p><b>Plenary activities:</b></p> <p><b>Plenary Activity (Cool down):</b></p> <p><b>“Stretch”</b> - (Arms, fingers, backs &amp; legs)</p> | <b>Differentiation:</b> |
|--------------|-----------------------------------------------------------------------------------------------------------------------------------------------------------------------------------------------------------------------------------------------------------------------------------------------------------------------------------------------------------------------------------------------------------------------------------------------------------------------------------------------------------------------------------------------------------------------------------------------------------------------------------------------------------------------------------------------------------------------------------------------------------------------------------------------------------------------------------------------------------------------------------------------------------------------------------------------------------------------|-------------------------|

Evaluation:

Resources Needed:

Mats x6, Bean bags, Baskets, Music

Class:

Date:

Topic: Lesson 3 Balance and Linking Actions

What we are learning today (WALT):

Student Numbers: Male: \_\_\_\_\_ Female: \_\_\_\_\_ SEN: \_\_\_\_\_ G&T: \_\_\_\_\_

|              |                                                                                                                                                                                                                                                                                                                                                                                                                                                                                                                                                                                                                                                                                                                                                                                                                                                                                                                                                                                                                                                                                                                           |                         |
|--------------|---------------------------------------------------------------------------------------------------------------------------------------------------------------------------------------------------------------------------------------------------------------------------------------------------------------------------------------------------------------------------------------------------------------------------------------------------------------------------------------------------------------------------------------------------------------------------------------------------------------------------------------------------------------------------------------------------------------------------------------------------------------------------------------------------------------------------------------------------------------------------------------------------------------------------------------------------------------------------------------------------------------------------------------------------------------------------------------------------------------------------|-------------------------|
| <b>Times</b> | <b>Starter activities:</b><br><br>“ <b>Traffic lights</b> ” - (Green - go fast, Amber - slow down, Red - Stop)<br>“ <b>Dotty Spot</b> ” - (Follow instructions by coach, ie: stand in front, stand behind, one foot on the floor, one hand etc.)<br><br><b>Learning activities:</b><br><br>“ <b>Lame dog</b> ” - (On all fours, hands and knees, follow instructions ie: left arm, right arm, left leg, right leg etc. Hold each item up for 5 seconds)<br>“ <b>Buzz bridge</b> ” - (Walk in pairs, one on all fours, hands and feet with hands in a hoop, other child pass the hoop along body to feet without touching the body)<br>“ <b>Step on, off, over</b> ” - (Using a bench, children step on, off and over <u>carefully!</u> )<br>“ <b>High Jinx jump</b> ” - (Using a bench, jump onto a mat- stretch, star, truck, quarter turn, half turn, full turn)<br>“ <b>Jump to the beat</b> ” - (Using music, marching, jumping jacks with hands on hips, grapevine, kicker twister & rocker)<br><b>Plenary activities:</b><br><br>“ <b>Sleeping Donkey</b> ” - (Child on fours, hand and knees. Close eyes and wait) | <b>Differentiation:</b> |
|--------------|---------------------------------------------------------------------------------------------------------------------------------------------------------------------------------------------------------------------------------------------------------------------------------------------------------------------------------------------------------------------------------------------------------------------------------------------------------------------------------------------------------------------------------------------------------------------------------------------------------------------------------------------------------------------------------------------------------------------------------------------------------------------------------------------------------------------------------------------------------------------------------------------------------------------------------------------------------------------------------------------------------------------------------------------------------------------------------------------------------------------------|-------------------------|

Evaluation:

Resources Needed:

Mats x 3, hoops, spots, bench and music
